# Supplementary material for: Genetic Divergence and Population Structure of Xanthomonas albilineans Strains Infecting Saccharum spp. Hybrid and Saccharum officinarum
Source: MDPI journal article supplement (doi:10.3390/plants12101937), 2023-05-09
Supplement: s1 [file s1]

**Table S1:** Sizes and sequence identities (%) of five housekeeping genes of 39 *X. albilineans* strains from China.

| Gene        | Nucleotide  |              | Amino Acids |              |
|-------------|-------------|--------------|-------------|--------------|
|             | Length (nt) | Identity (%) | Length (aa) | Identity (%) |
| <i>ABC</i>  | 608         | 99.6 – 100   | 202         | 99.5 – 100   |
| <i>gyrB</i> | 904         | 99.3 – 100   | 300         | 99.3 – 100   |
| <i>rpoD</i> | 1298        | 98.4 – 100   | 432         | 97.9 – 100   |
| <i>atpD</i> | 868         | 97.0 – 100   | 289         | 97.9 – 100   |
| <i>glnA</i> | 1095        | 97.6 – 100   | 364         | 97.5 – 100   |

**Table S2:** Primers used for the amplification of five house-keeping genes of 39 *X. albilineans* strains from China.

| Target Genes <sup>a</sup> | Primers <sup>b</sup> | Sequence (5'→3')        | NCBI Accession Numbers <sup>c</sup>                                        |
|---------------------------|----------------------|-------------------------|----------------------------------------------------------------------------|
| <i>ABC</i>                | XAF1                 | CCTGGTGATGACGCTGGGTT    | MT776083-MT776094, MT776096-MT776106, MT776108-MT776122, MH709206          |
|                           | XAR1                 | CGATCAGCGATGCACGCAGT    |                                                                            |
| <i>atpD</i>               | atpD-F2              | GGGCAAGATCGTTCAGAT      | MT776144-MT776148, MT776150-MT776155, ON112168-ON112195                    |
|                           | atpD-R2              | GTTCTTGGTGGAGGTGAT      |                                                                            |
| <i>glnA</i>               | glnA-F2              | GGTTAAGGACAACAAGATCG    | MT776160-MT776164, MT776166-MT776171, ON112107-ON112125, ON112131-ON112139 |
|                           | glnA-R2              | GCGGCRAAGGTCAGGTAG      |                                                                            |
| <i>gyrB</i>               | XgyrB1F              | ACGAGTACAACCCGGACAA     | MT776038-MT776049, MT776051-MT776061, MT776063-MT776077, MH709220          |
|                           | XgyrB1R2             | CCCATCAAGGTGCTGAAAAT    |                                                                            |
| <i>rpoD</i>               | rpoD-F1              | ATGGCCAACGAACGTCCTGC    | MT776128-MT776132, MT776134-MT776139, ON112140-ON112167                    |
|                           | rpoDR3               | AACTTGTAGCCGCGACGGTATTC |                                                                            |

<sup>a</sup> *ABC*, ABC transporter protein; *rpoD*, encoding the  $\beta$  subunit of the bacterial RNA polymerase; *glnA*, encoding a citrate synthase; *gyrB*,  $\beta$  subunit of the DNA gyrase; *atpD*,  $\beta$  subunit of ATP synthase.

<sup>b</sup> The primer pair XAF1/XAR1 and other four primer pairs were referred to Wang et al. (2010) and Ntambo et al. (2019), respectively.

<sup>c</sup> The sequences of *ABC* gene were from this study, while the sequences of other four genes were retrieved from the observation by Zhao et al. (2022).

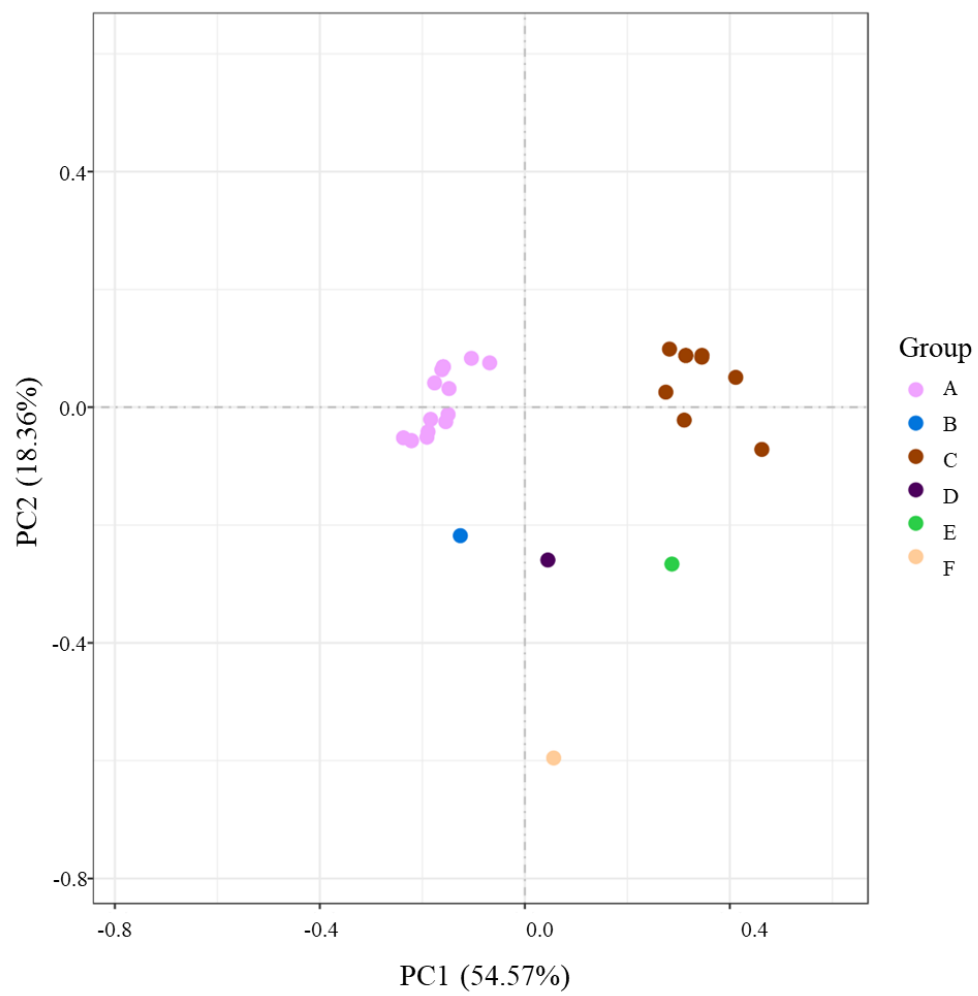

**Figure S1:** Principal coordinates analysis of 39 *X. albilineans* strains of based on rep-PCR fingerprints.
